# Supplementary material for: Comprehensive analysis of cationic dye removal from synthetic and industrial wastewater using a semi-natural curcumin grafted biochar/poly acrylic acid composite hydrogel
Source: Royal Society of Chemistry journal article supplement (doi:10.1039/d3ra08521j), 2024-01-01
Supplement: d3ra08521j1.pdf [file d3ra08521j1.pdf]

## Supplementary Information

# Comprehensive Analysis of Cationic Dye Removal from Synthetic and Industrial Wastewater Using Semi-Natural Curcumin Grafted Biochar/Poly Acrylic Acid Composite Hydrogel

Elias Mosaffa<sup>a,b</sup>, Rishikumar Indravadan Patel<sup>a,b</sup>, Atanu Banerjee<sup>\*a</sup>, Biraj. B. Basak<sup>c</sup>, Maryam Orouzadeh<sup>d</sup>

Corresponding Author's email ID: [atanubanerjee.rnd@charusat.ac.in](mailto:atanubanerjee.rnd@charusat.ac.in)

<sup>a</sup> Dr. K. C. Patel R & D Centre, Charotar University of Science and Technology (CHARUSAT), Anand, Gujarat, India.

<sup>b</sup> P D Patel Institute of Applied Sciences, Charotar University of Science and Technology (CHARUSAT), Anand, Gujarat, India.

<sup>c</sup> ICAR-Directorate of Medicinal and Aromatic Plants Research, Anand 387310, India

<sup>d</sup> Faculty of Polymer Science, Department of Polyurethane and Advanced Materials, Iran Polymer and Petrochemical Institute, Tehran, Iran

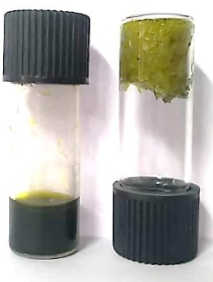

Fig. S1. Image of the hydrogel formation, before (left) and after (right) formation of the gel.

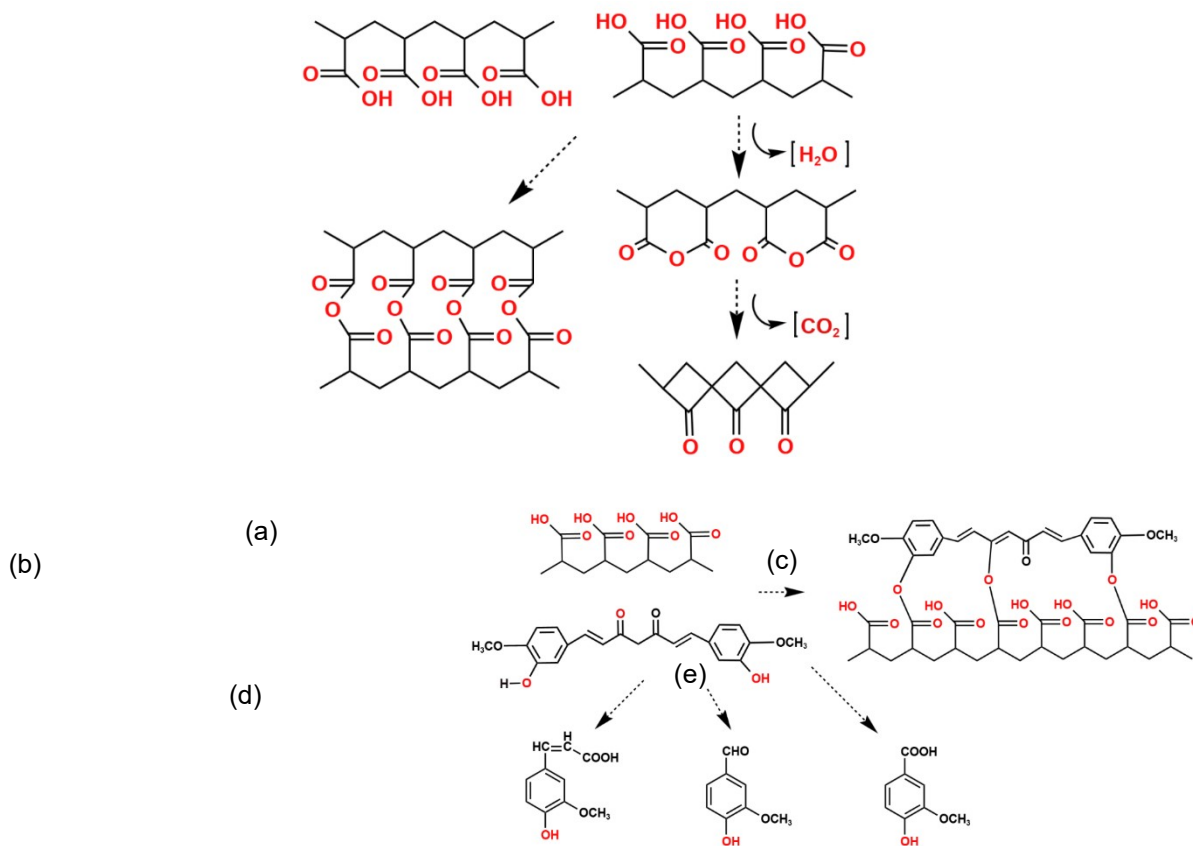

Fig. S<sub>2</sub> Possible degradation of synthesized composite hydrogel<sup>1</sup>.

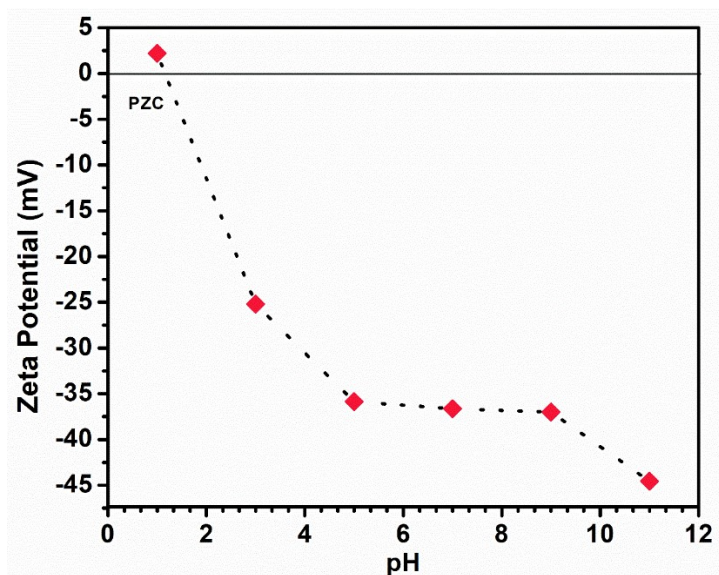

Fig. S<sub>3</sub> Zeta potential results of adsorbent versus pH.

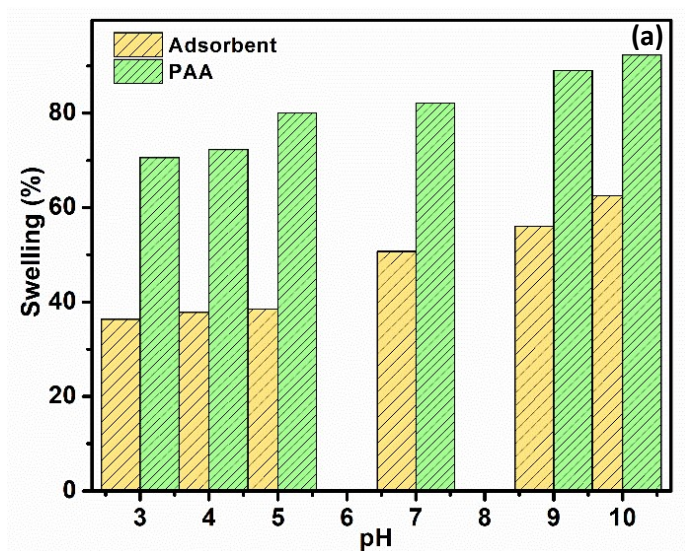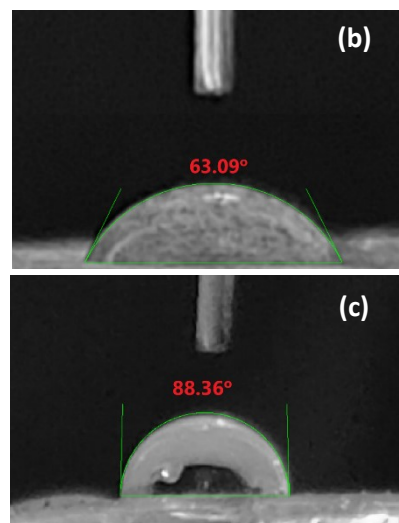

Fig.S<sub>4</sub> Swelling of the adsorbent and pure PAA hydrogel (a), contact angle of PAA (b) and adsorbent (c).

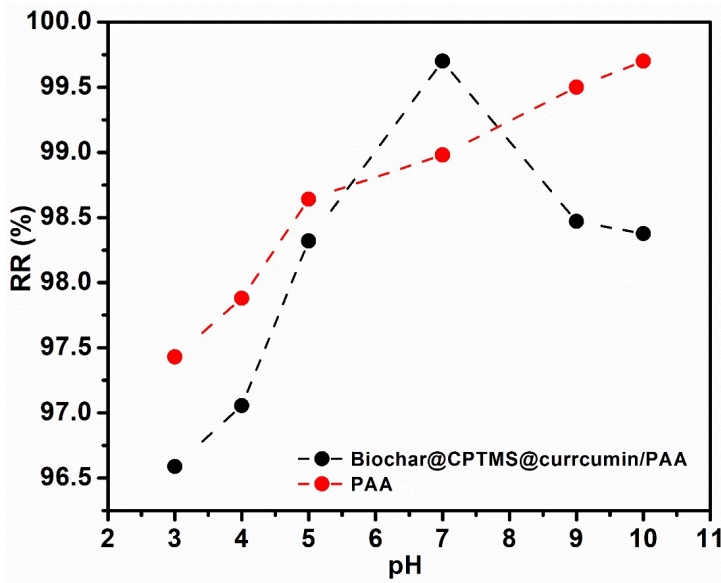

Fig. S<sub>5</sub> stability analysis data with pH variation after 10 days.

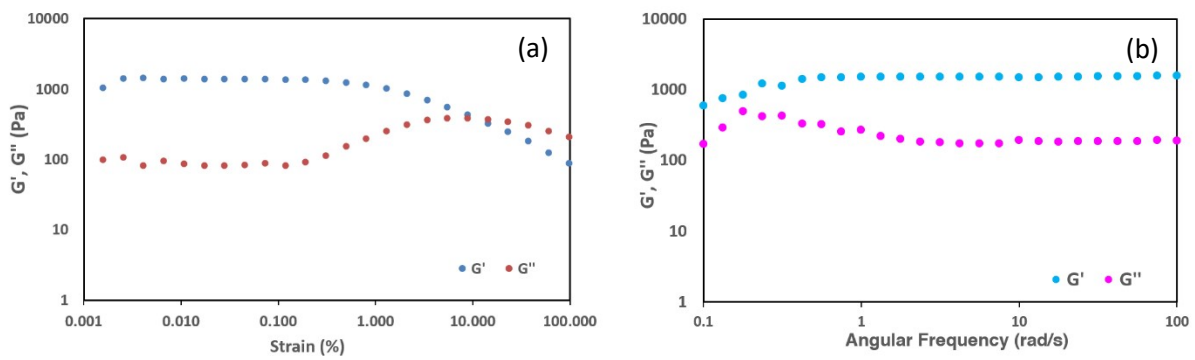

Fig. S<sub>6</sub>. Dependence of storage ( $G'$ ) and loss ( $G''$ ) modulus on the strain in strain sweep test (a) and on the angular frequency in frequency sweep test (b)

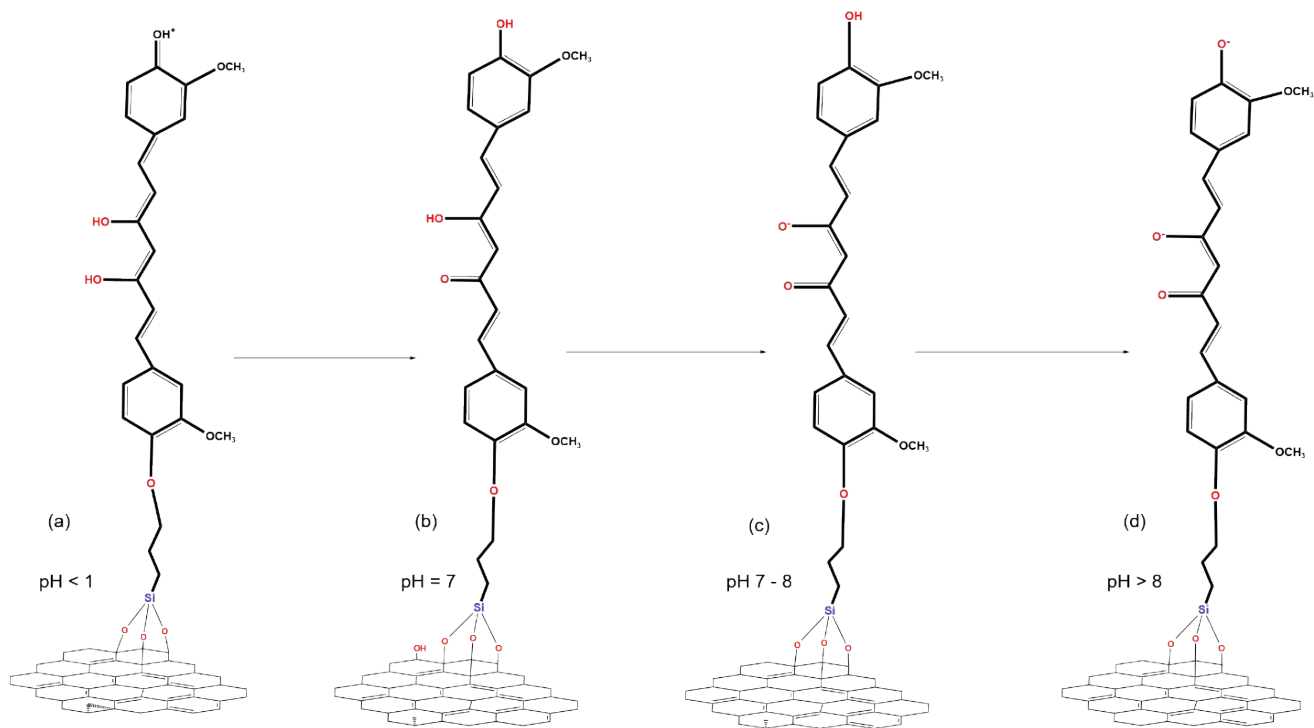

Fig. S<sub>7</sub> pH dependency of curcumin structure<sup>1</sup>.

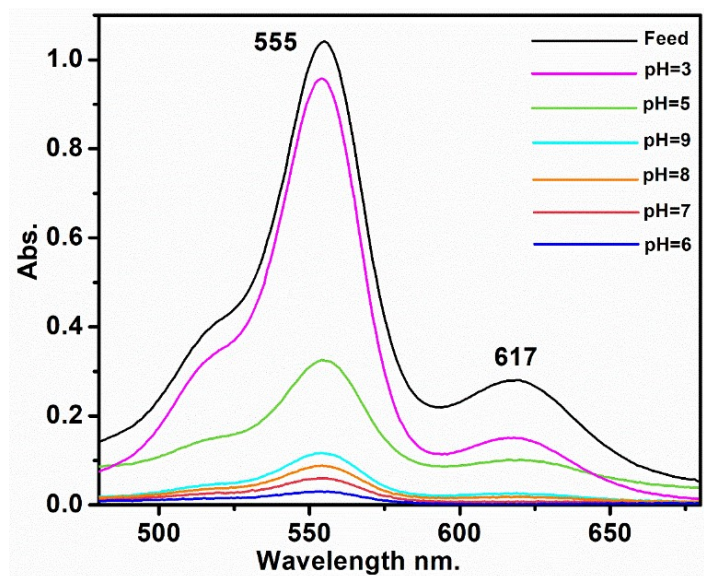

Fig. S<sub>8</sub> UV-Vis spectra of mixed dye solutions before and after adsorption in different pH.

Table. S<sub>1</sub> Linear and non-linear form of applied Isotherms and Kinetic models.

| Isotherm   |                                                                                                |                                                                                                |                                                                                                                                                                                                                     |
|------------|------------------------------------------------------------------------------------------------|------------------------------------------------------------------------------------------------|---------------------------------------------------------------------------------------------------------------------------------------------------------------------------------------------------------------------|
| Title      | Linear Equation                                                                                | Nonlinear Equation                                                                             | Parameters                                                                                                                                                                                                          |
| Henry's    | $Q_e = K_{HE} C_e$                                                                             | -----                                                                                          | $K_{HE}$ denotes the Henry's adsorption constant <sup>2</sup> .                                                                                                                                                     |
| Langmuir   | $\frac{1}{Q_e} = \frac{1}{Q_m} + \frac{1}{k_L Q_m C_e}$<br>$R_L = \frac{1}{1 + k_L C_e}$       | $Q_e = \frac{Q}{1 + kC_e}$                                                                     | $k_L$ (L.mg <sup>-1</sup> ) and $Q_m$ (mg.g <sup>-1</sup> ) signify Langmuir adsorption constant and maximum adsorption capacity at equilibrium and $R_L$ shows the favorability of model <sup>3</sup> .            |
| Freundlich | $\log Q_e = \log k_f + \frac{1}{n} \log C_e$                                                   | $Q_e = k_f C_e^{\frac{1}{n}}$                                                                  | $k_F$ ((mg.g <sup>-1</sup> ) (L.mg) <sup>1/n</sup> ) is the Freundlich constant and 1/n implies the surface heterogeneity and shows the relative distribution of energy <sup>4</sup> .                              |
| Temkin     | $Q_e = \frac{RT}{b_T} \ln A_T + \left(\frac{RT}{b_T}\right) \ln C_e$                           | $Q_e = \frac{RT}{b_T} \ln A_T C_e$                                                             | $b_T$ and $A_T$ represent Temkin models constant (KJ.mol <sup>-1</sup> ) and equilibrium binding constant (L.g <sup>-1</sup> ) <sup>5</sup> .                                                                       |
| Jovanovic  | $\ln Q_e = \ln Q_{max} - k_J C_e$                                                              | $Q_e = Q_{max}(1 - e^{-k_J C_e})$                                                              | $k_J$ (L.g <sup>-1</sup> ) exhibits the Jovanovic models constant and $Q_{max}$ (mg.g <sup>-1</sup> ) indicates the maximum adsorption capacity at equilibrium <sup>6</sup> .                                       |
| K-C        | $\frac{1}{Q_e} = \frac{1}{A_{KC} C_e^n} + \frac{B_{KC}}{A}$                                    | $Q_e = \frac{A_{KC} C_e^n}{1 + B_{KC} C_e^n}$                                                  | $A_{KC}$ (L <sup>n</sup> .mg <sup>1-n</sup> .g <sup>-1</sup> ), $B_{KC}$ (L.mg <sup>-1</sup> ) <sup>n</sup> and n are Koble–Corrigan isotherm constants <sup>7</sup> .                                              |
| Hill       | $\log \left( \frac{Q_e}{Q_{SH} - Q_e} \right) = n_H \log C_e - \log k_D$                       | $Q_e = \left( \frac{Q_{SH} C_e^{n_H}}{K_D + C_e^{n_H}} \right)$                                | $Q_{SH}$ (mg.g <sup>-1</sup> ) and $k_D$ signify the Hill maximum uptake and isotherm constant while $n_H$ is the cooperativity of binding interaction <sup>8</sup> .                                               |
| R-P        | $\ln \left( k_R \frac{C_e}{Q_e} - 1 \right) = g \ln(C_e) + \ln \alpha_R$                       | $Q_e = \frac{k_R C_e}{1 + \alpha_R C_e^g}$                                                     | $k_R$ (L.g <sup>-1</sup> ) and $\alpha_R$ (L.mg <sup>-1</sup> ) are the R-P isotherm constant and g implies the models exponent <sup>9</sup> .                                                                      |
| Sips       | $\frac{1}{Q_e} = \frac{1}{Q_s k_s} \left( \frac{1}{C_e} \right)^{\frac{1}{n}} + \frac{1}{Q_s}$ | $Q_e = \frac{k_s Q_s C_e^{\frac{1}{n}}}{1 + k_s C_e^{\frac{1}{n}}}$                            | $k_S$ (mg.L <sup>-1</sup> ) and $Q_s$ (mg.g <sup>-1</sup> ) reveal the Sips adsorption isotherm constant and maximum uptake at equilibrium respectively and 1/n discloses the surface heterogeneity <sup>10</sup> . |
| Kinetic    |                                                                                                |                                                                                                |                                                                                                                                                                                                                     |
| PFO        | $Q_t = Q_e (1 - \exp^{-k_1 t})$                                                                | $\ln(Q_e - Q_t) = \ln Q_e - k_1 t$                                                             | $K_1$ (min <sup>-1</sup> ) implies the PFO kinetic constant and $Q_e$ (mg.g <sup>-1</sup> ) is the maximal uptake at equilibrium <sup>11</sup> .                                                                    |
| PSO        | $Q = \frac{K_2 Q_e^2 t}{1 + K_2 Q_e t}$                                                        | $\frac{t}{Q_t} = \frac{1}{K_2 Q_e^2} + \frac{t}{Q_e}$                                          | $K_2$ (g.mg <sup>-1</sup> .min <sup>-1</sup> ) shows the PSO kinetic constant and $Q_e$ (mg.g <sup>-1</sup> ) is the maximum adsorption capacity <sup>12</sup> .                                                    |
| Elovich    | $Q_t = \frac{1}{\beta} \ln \alpha \beta t$                                                     | $Q_t = \frac{1}{\beta} \ln(\alpha \beta) + \frac{1}{\beta} \ln t$                              | $\alpha_{El}$ (g.mg <sup>-1</sup> ) and $\beta_{El}$ (g.mg <sup>-1</sup> ) denoting preliminary rate of adsorption and Elovich model constant <sup>13</sup> .                                                       |
| LFD        | $Q_t = Q_{\infty} [1 - \exp^{-Rt}]$                                                            | $\ln \left( 1 - \frac{Q_t}{Q_{\infty}} \right) = -Rt$                                          | $R$ (min <sup>-1</sup> ) is fractional attainment of equilibrium and $Q_{\infty}$ (mg.g <sup>-1</sup> ) is maximum adsorption capacity at equilibrium <sup>14</sup> .                                               |
| ID         | $Q_t = k_{id} \sqrt{t} + I$                                                                    |                                                                                                | $K_{id}$ (mg/g.min <sup>0.5</sup> ) indicates the intraparticle diffusion rate constant and $I$ (mg.g <sup>-1</sup> ) is a constant correlated to thickness of boundary layer <sup>12</sup> .                       |
| Bangham    | $Q_t = Q_m [1 - \exp(-k_b t^n)]$                                                               | $\log \log \left( \frac{C_i}{C_i - Q_t M} \right) = \log \left( \frac{K_j M}{2.303 V} \right)$ | $Q_m$ and $k_b$ signify the maximal uptake and Bangham rate coefficient, while n is the Bangham models power <sup>15</sup> .                                                                                        |

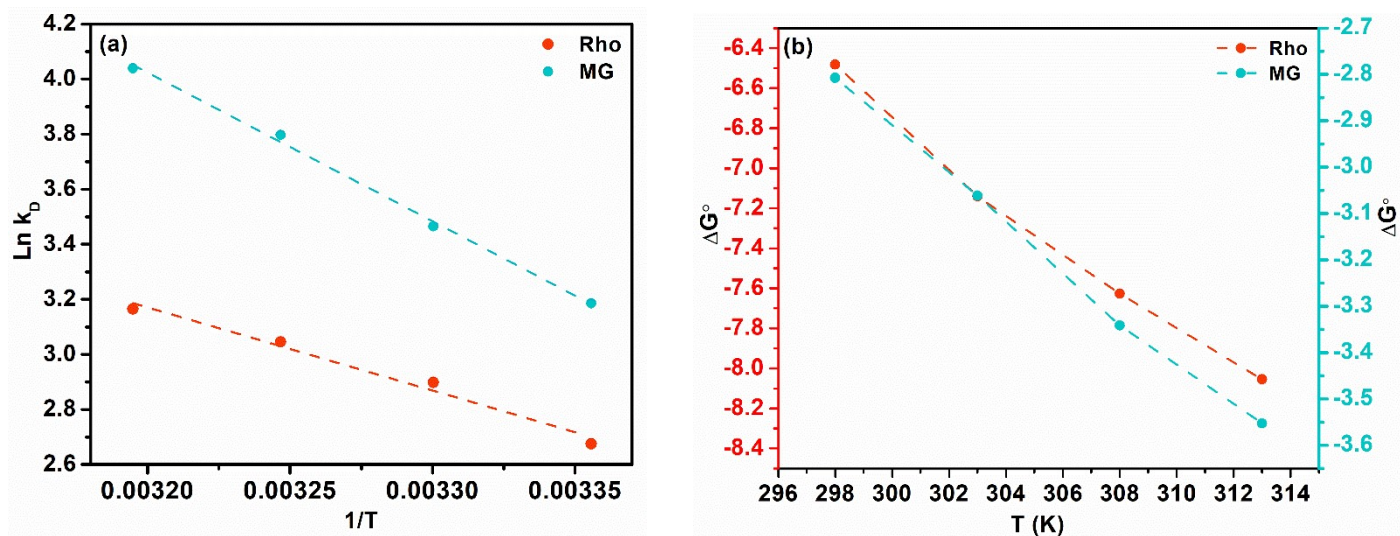

Fig. S<sub>9</sub> Thermodynamic plot (a), and Gibbs free energy plot (b) for the adsorption of Rho and MG onto F-Biochar.

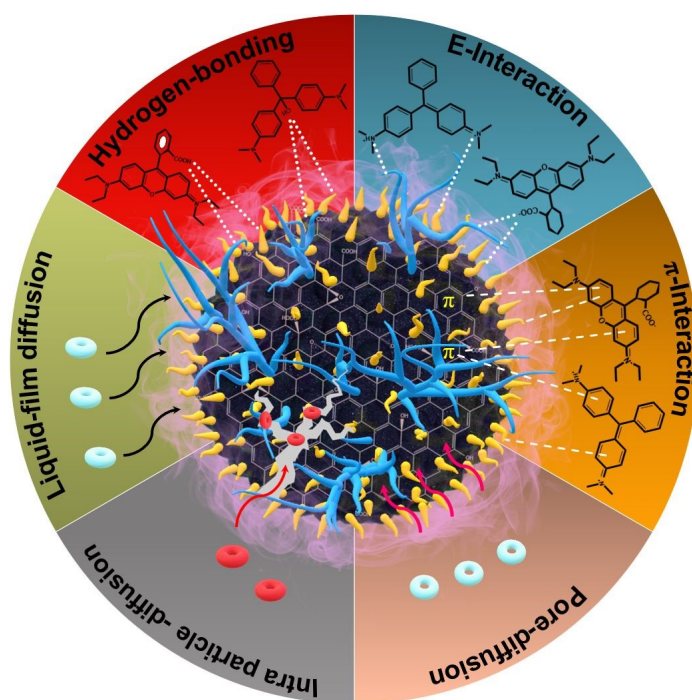

Fig. S<sub>10</sub> Graphical representation of potential adsorption phenomena during the adsorption of dye.

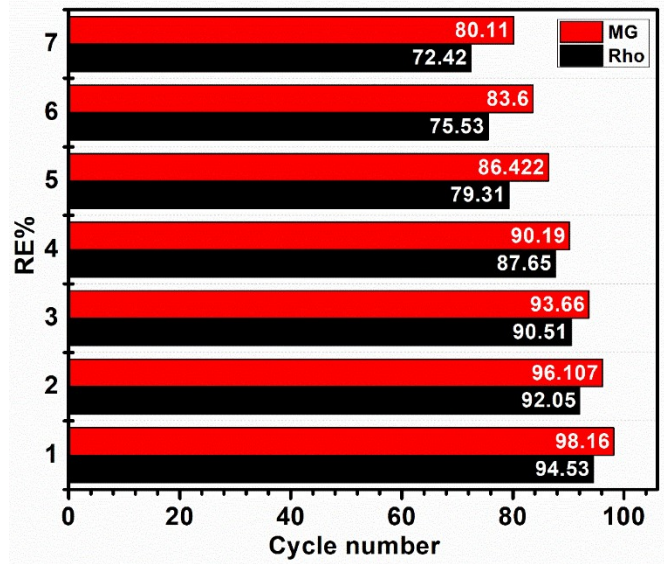

Fig. S<sub>11</sub> Reusability results.

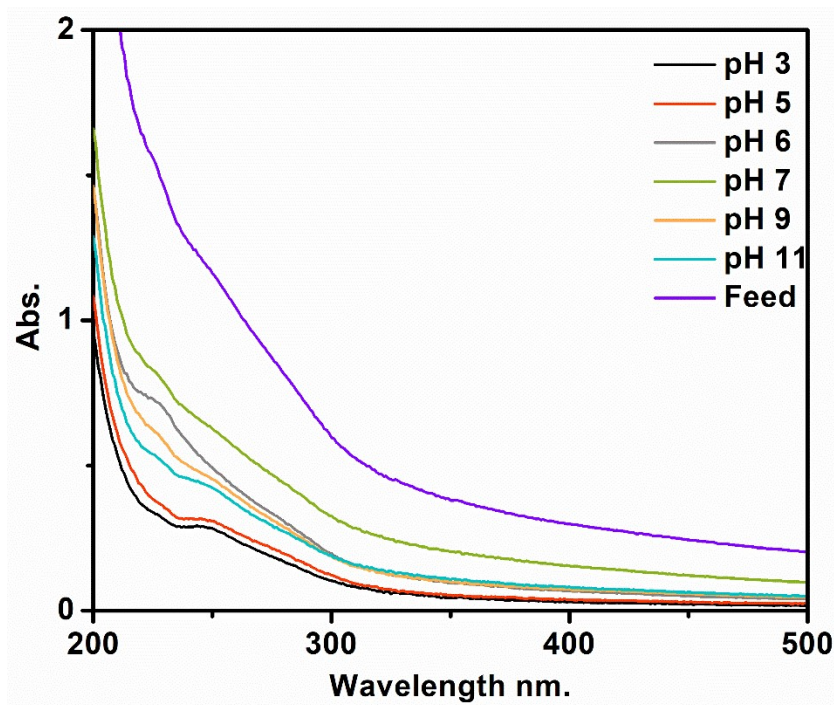

Fig. S<sub>12</sub> UV graph of industrial sample before and after adsorption in different pH.

Table.S<sub>2</sub> Comparison with Other Literature.

| Adsorbent                                                            | Adsorbate | Q <sub>e</sub> (mg. g <sup>-1</sup> ) | Ref               |
|----------------------------------------------------------------------|-----------|---------------------------------------|-------------------|
| CAC MercK                                                            | MG        | 222.22                                | 16                |
| Fe <sub>3</sub> O <sub>4</sub> @AMCA-MIL-53 (Al)                     | MG        | 262.52                                | 17                |
| Sawdust carbon                                                       | MG        | 74.5                                  | 18                |
| Fe <sub>3</sub> O <sub>4</sub> @AJPL                                 | MG        | 318.3                                 | 19                |
| PB clay                                                              | MG        | 497.15                                | 20                |
| NCH based on carrageenan, AA, and AgCl                               | MG        | 270                                   | 21                |
| poly(AAm/AACNa) hydrogel                                             | Rho       | 469.48                                | 22                |
| chitosan hydrogel                                                    | Rho       | 556.9                                 | 23                |
| Pyruvic acid (PA)-modified activated carbons                         | Rho       | 384.6                                 | 24                |
| Gum ghatti and Fe <sub>3</sub> O <sub>4</sub> magnetic nanoparticles | Rho       | 654.87                                | 3                 |
| Acrylic acid functionalized graphene oxide                           | Rho       | 437.1                                 | 25                |
| PAA-AM/FA                                                            | Rho       | 366                                   | 26                |
| CTS-g-P(AA-co-AMPS)/GO                                               | MG        | 625.3                                 | 27                |
| Biochar@curcumin/poly AA                                             | MG        | 521.92                                | <b>This Study</b> |
| Biochar@curcumin/poly AA                                             | Rho       | 742.53                                |                   |

## References

- (1) Lee, W.-H.; Loo, C.-Y.; Bebawy, M.; Luk, F.; Mason, R. S.; Rohanizadeh, R. Curcumin and its derivatives: their application in neuropharmacology and neuroscience in the 21st century. *Current neuropharmacology* **2013**, *11* (4), 338-378. DOI: 10.2174/1570159X11311040002.
- (2) Ayawei, N.; Ebelegi, A. N.; Wankasi, D. Modelling and interpretation of adsorption isotherms. *Journal of chemistry* **2017**, *2017*. DOI: 10.1155/2017/3039817.
- (3) Mittal, H.; Mishra, S. B. Gum ghatti and Fe<sub>3</sub>O<sub>4</sub> magnetic nanoparticles based nanocomposites for the effective adsorption of rhodamine B. *Carbohydr Polym* **2014**, *101*, 1255-1264. DOI: 10.1016/j.carbpol.2013.09.045 From NLM Medline.
- (4) Kumar, N.; Reddy, L.; Parashar, V.; Ngila, J. C. Controlled synthesis of microsheets of ZnAl layered double hydroxides hexagonal nanoplates for efficient removal of Cr (VI) ions and anionic dye from water. *Journal of environmental chemical engineering* **2017**, *5* (2), 1718-1731.
- (5) Ringot, D.; Lerzy, B.; Chaplain, K.; Bonhoure, J.-P.; Auclair, E.; Larondelle, Y. In vitro biosorption of ochratoxin A on the yeast industry by-products: Comparison of isotherm models. *Bioresource technology* **2007**, *98* (9), 1812-1821.
- (6) Saadi, R.; Saadi, Z.; Fazaeli, R.; Fard, N. E. Monolayer and multilayer adsorption isotherm models for sorption from aqueous media. *Korean Journal of Chemical Engineering* **2015**, *32*, 787-799.
- (7) Koble, R. A.; Corrigan, T. E. Adsorption isotherms for pure hydrocarbons. *Industrial & Engineering Chemistry* **1952**, *44* (2), 383-387. DOI: 10.1021/ie50506a049.
- (8) Sharma, Y. Fast removal of malachite green by adsorption on rice husk activated carbon. *The Open Environmental Pollution & Toxicology Journal* **2009**, *1* (1).
- (9) Ng, J.; Cheung, W.; McKay, G. Equilibrium studies of the sorption of Cu (II) ions onto chitosan. *Journal of colloid and interface science* **2002**, *255* (1), 64-74.



- (10) Kumara, N.; Hamdan, N.; Petra, M. I.; Tennakoon, K. U.; Ekanayake, P. Equilibrium isotherm studies of adsorption of pigments extracted from Kuduk-kuduk (*Melastoma malabathricum* L.) pulp onto TiO<sub>2</sub> nanoparticles. *Journal of Chemistry* **2014**, 2014.
- (11) Hashem, A.; Hammad, H. A.; Al-Anwar, A. Modified Camelorum tree particles as a new adsorbent for adsorption of Hg (II) from aqueous solutions: kinetics, thermodynamics and non-linear isotherms. *Desalination and Water Treatment* **2016**, 57 (50), 23827-23843.
- (12) Villarante, N. R.; Bautista, A. P. R.; Sumalapao, D. E. P. Batch adsorption study and kinetic profile of Cr (VI) using lumbang (*Aleurites moluccana*)-derived activated carbon-chitosan composite crosslinked with epichlorohydrin. *Orient. J. Chem* **2017**, 33 (3), 1111-1119.
- (13) Yousef, N.; Farouq, R.; Hazzaa, R. Adsorption kinetics and isotherms for the removal of nickel ions from aqueous solutions by an ion-exchange resin: application of two and three parameter isotherm models. *Desalination and Water Treatment* **2016**, 57 (46), 21925-21938. DOI: 10.1080/19443994.2015.1132474.
- (14) Boyd, G.; Adamson, A. W.; Myers Jr, L. The exchange adsorption of ions from aqueous solutions by organic zeolites. II. Kinetics1. *Journal of the American Chemical Society* **1947**, 69 (11), 2836-2848.
- (15) Hashem, A.; Badawy, S.; Farag, S.; Mohamed, L.; Fletcher, A.; Taha, G. Non-linear adsorption characteristics of modified pine wood sawdust optimised for adsorption of Cd (II) from aqueous systems. *Journal of Environmental Chemical Engineering* **2020**, 8 (4), 103966.
- (16) Malik, R.; Ramteke, D. S.; Wate, S. R. Adsorption of malachite green on groundnut shell waste based powdered activated carbon. *Waste Manag* **2007**, 27 (9), 1129-1138. DOI: 10.1016/j.wasman.2006.06.009 From NLM Medline.
- (17) Alqadami, A. A.; Naushad, M.; Allothman, Z. A.; Ahamad, T. Adsorptive performance of MOF nanocomposite for methylene blue and malachite green dyes: Kinetics, isotherm and mechanism. *J Environ Manage* **2018**, 223, 29-36. DOI: 10.1016/j.jenvman.2018.05.090 From NLM Medline.
- (18) Garg, V. K.; Gupta, R.; Bala Yadav, A.; Kumar, R. Dye removal from aqueous solution by adsorption on treated sawdust. *Bioresour Technol* **2003**, 89 (2), 121-124. DOI: 10.1016/s0960-8524(03)00058-0 From NLM Medline.
- (19) Alorabi, A. Q. Effective removal of malachite green from aqueous solutions using magnetic nanocomposite: synthesis, characterization, and equilibrium study. *Adsorption Science & Technology* **2021**, 2021, 1-15. DOI: 10.1155/2021/2359110.
- (20) Mittal, H.; Parashar, V.; Mishra, S.; Mishra, A. Fe<sub>3</sub>O<sub>4</sub> MNPs and gum xanthan based hydrogels nanocomposites for the efficient capture of malachite green from aqueous solution. *Chemical Engineering Journal* **2014**, 255, 471-482.
- (21) Dargahi, M.; Ghasemzadeh, H.; Bakhtiary, A. Highly efficient absorption of cationic dyes by nano composite hydrogels based on kappa-carrageenan and nano silver chloride. *Carbohydr Polym* **2018**, 181, 587-595. DOI: 10.1016/j.carbpol.2017.11.108 From NLM PubMed-not-MEDLINE.
- (22) Ismail, L. F.; Maziad, N. A.; Abo-Farha, S. A. Factors affecting the adsorption of cationic dyes on polymeric hydrogels prepared by gamma irradiation. *Polymer international* **2005**, 54 (1), 58-64.
- (23) Tang, Y.; He, T.; Liu, Y.; Zhou, B.; Yang, R.; Zhu, L. Sorption behavior of methylene blue and rhodamine B mixed dyes onto chitosan graft poly (acrylic acid-co-2-acrylamide-2-methyl propane sulfonic acid) hydrogel. *Advances in Polymer Technology* **2018**, 37 (7), 2568-2578.
- (24) Huang, Y.; Zheng, X.; Feng, S.; Guo, Z.; Liang, S. Enhancement of rhodamine B removal by modifying activated carbon developed from *Lythrum salicaria* L. with pyruvic acid. *Colloids and Surfaces A: Physicochemical and Engineering Aspects* **2016**, 489, 154-162.
- (25) Wang, G.; Li, G.; Huan, Y.; Hao, C.; Chen, W. Acrylic acid functionalized graphene oxide: High-efficient removal of cationic dyes from wastewater and exploration on adsorption mechanism. *Chemosphere* **2020**, 261, 127736. DOI: 10.1016/j.chemosphere.2020.127736 From NLM Medline.

- (26) Zhu, W.; Zhang, Y.; Wang, P.; Yang, Z.; Yasin, A.; Zhang, L. Preparation and Applications of Salt-Resistant Superabsorbent Poly (Acrylic Acid-Acrylamide/Fly Ash) Composite. *Materials (Basel)* **2019**, *12* (4), 596. DOI: 10.3390/ma12040596 From NLM PubMed-not-MEDLINE.
- (27) Zhu, L.; Liu, Y.; Yaoji Tang, Y. L. Synthesis of chitosan graft poly (acrylic acid-co-2-acrylamide-2-methylpropanesulfonic acid)/graphite oxide composite hydrogel and the study of its adsorption. *Polymers and Polymer Composites* **2022**, *30*, 09673911221086164.
